# Supplementary material for: Heptacoordinate transition-metal-decorated metallo-borospherenes and multiple-helix metallo-boronanotubes
Source: Royal Society of Chemistry journal article supplement (doi:10.1039/d2nr05486h), 2022-12-26
Supplement: d2nr05486h1.pdf [file d2nr05486h1.pdf]

## Supporting information

### Heptacoordinate Transition-Metal-Decorated Metallo-Borosphenes and Multiple-Helix Metallo-Boronanotubes

Mei-Zhen Ao,<sup>a,b</sup> Fei Zhang,<sup>a</sup> Yuan-Yuan Ma,<sup>a</sup> Yue-Wen Mu,<sup>\*a</sup> and Si-Dian Li<sup>\*a</sup>

<sup>a</sup>*Nanocluster Laboratory, Institute of Molecular Science, Shanxi University, Taiyuan 030006, P.R. China.*

<sup>b</sup>*Fenyang College of Shanxi Medical University, Fenyang 032200, China*

*\*E-mail: ywmu@sxu.edu.cn and lisidian@sxu.edu.cn*

#### Table of Contents

**Figure S1.** Lowest-lying isomers of (a)  $\text{Ni}_6\text{B}_{39}^-$ , (b)  $\text{Ni}_6\text{B}_{40}$ , (c)  $\text{Ni}_6\text{B}_{41}^+$ , (d)  $\text{Ni}_6\text{B}_{42}^{2+}$ , (e)  $\text{Ni}_6\text{B}_{42}$ , and (f)  $\text{Ni}_8\text{B}_{56}$ .

**Figure S2.** The optimized structures of  $C_2 \text{Ni}_{10}\text{B}_{70}$  (**7**), and  $C_2 \text{Ni}_{12}\text{B}_{84}$  (**8**).

**Figure S3.** BOMD simulations of (a)  $C_2 \text{Ni}_6\text{B}_{39}^-$  (**1**), (b)  $D_{2d} \text{Ni}_6\text{B}_{40}$  (**2**), (c)  $C_1 \text{Ni}_6\text{B}_{41}^+$  (**3**), (d)  $C_2 \text{Ni}_6\text{B}_{42}^{2+}$  (**4**), (e)  $\text{Ni}_6\text{B}_{42}$  (**5**), and (f)  $\text{Ni}_8\text{B}_{56}$  (**6**).

**Figure S4.** The optimized structures of 1D Ni/B binary nanotubes.

**Figure S5.** Band structure and PDOS of a series of 1D Ni/B binary nanotubes.

**Table S1.** Optimized cartesian coordinates (x, y, z) of (a)  $C_2 \text{Ni}_6\text{B}_{39}^-$  (**1**), (b)  $D_{2d} \text{Ni}_6\text{B}_{40}$  (**2**), (c)  $C_1 \text{Ni}_6\text{B}_{41}^+$  (**3**), (d)  $C_2 \text{Ni}_6\text{B}_{42}^{2+}$  (**4**), (e)  $\text{Ni}_6\text{B}_{42}$  (**5**), (f)  $\text{Ni}_8\text{B}_{56}$  (**6**), (g)  $C_2 \text{Ni}_{10}\text{B}_{70}$  and (f)  $\text{Ni}_{12}\text{B}_{84}$  at PBE0/6-311+G(d) level.

**Figure S1.** Lowest-lying isomers of (a)  $\text{Ni}_6\text{B}_{39}^-$ , (b)  $\text{Ni}_6\text{B}_{40}$ , (c)  $\text{Ni}_6\text{B}_{41}^+$ , (d)  $\text{Ni}_6\text{B}_{42}^{2+}$ , (e)  $\text{Ni}_6\text{B}_{42}$ , and (f)  $\text{Ni}_8\text{B}_{56}$  with their relative energies indicated in eV at PBE0 and TPSSh (parentheses) levels, respectively.

(a)  $\text{Ni}_6\text{B}_{39}^-$

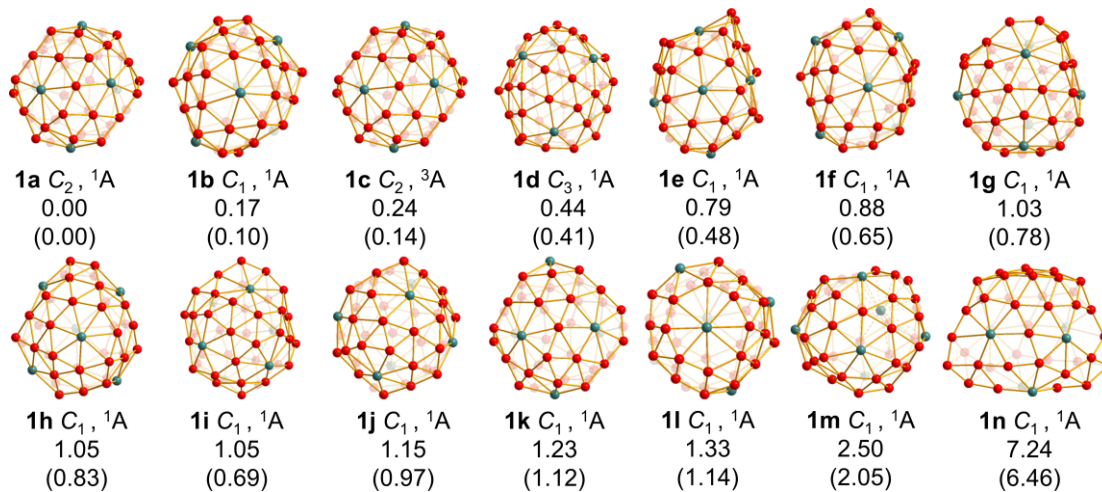

(b) Ni<sub>6</sub>B<sub>40</sub>

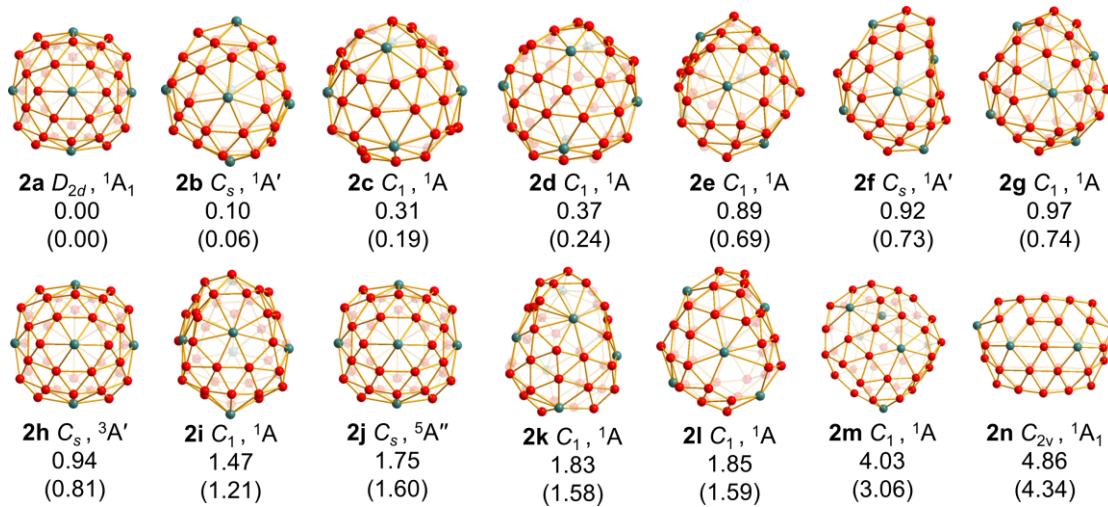

(c)  $\text{Ni}_6\text{B}_{41}^+$

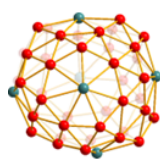

**3a**  $C_1, ^1A$   
0.00  
(0.00)

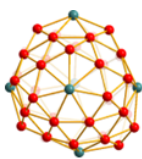

**3b**  $C_1, ^1A$   
0.08  
(0.15)

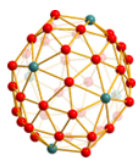

**3c**  $C_2, ^1A$   
0.19  
(0.18)

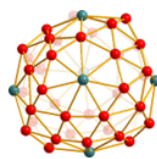

**3d**  $C_1, ^1A$   
0.25  
(0.28)

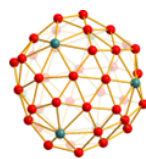

**3e**  $C_1, ^1A$   
0.26  
(0.29)

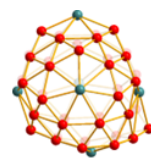

**3f**  $C_1, ^1A$   
0.40  
(0.40)

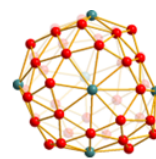

**3g**  $C_1, ^1A$   
0.67  
(0.66)

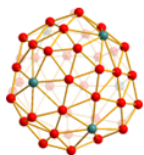

**3h**  $C_1, ^1A$   
1.46  
(1.39)

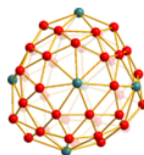

**3i**  $C_1, ^1A$   
1.54  
(1.52)

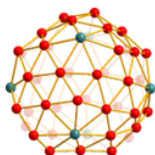

**3j**  $C_1, ^1A$   
1.57  
(1.52)

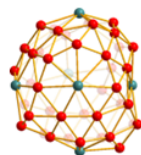

**3k**  $C_1, ^1A$   
1.84  
(1.61)

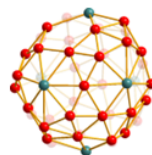

**3l**  $C_1, ^1A$   
1.91  
(1.87)

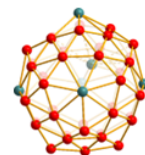

**3m**  $C_1, ^1A$   
2.52  
(2.28)

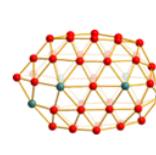

**3n**  $C_1, ^1A$   
5.78  
(5.18)

(d)  $\text{Ni}_6\text{B}_{42}^{2+}$

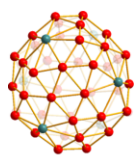

**4a**  $C_2, ^1A$   
0.00  
(0.00)

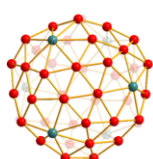

**4b**  $D_3, ^1A_1$   
0.28  
(0.25)

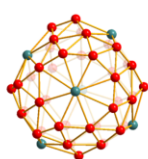

**4c**  $C_1, ^1A$   
0.61  
(0.56)

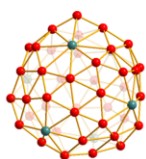

**4d**  $C_1, ^1A$   
0.65  
(0.55)

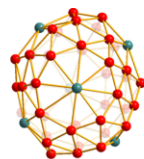

**4e**  $C_1, ^1A$   
0.69  
(0.57)

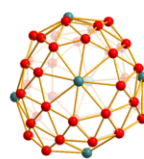

**4f**  $C_1, ^1A$   
0.97  
(0.86)

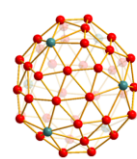

**4g**  $C_1, ^3A$   
1.02  
(0.97)

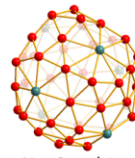

**4h**  $C_1, ^1A$   
1.08  
(0.98)

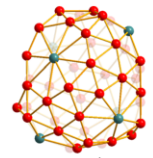

**4i**  $C_1, ^1A$   
1.19  
(1.06)

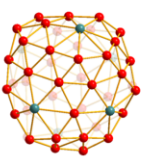

**4j**  $C_1, ^1A$   
1.21  
(1.11)

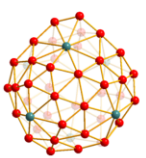

**4k**  $C_1, ^1A$   
1.23  
(1.03)

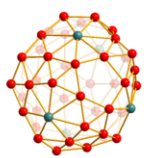

**4l**  $C_1, ^1A$   
1.35  
(1.20)

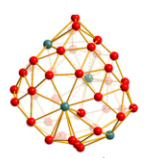

**4m**  $C_1, ^1A$   
4.29  
(3.26)

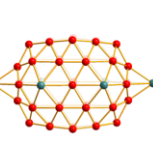

**4n**  $D_{2h}, ^1A_1$   
6.23  
(6.01)

(e) Ni<sub>6</sub>B<sub>42</sub>

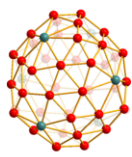

**5a** C<sub>2v</sub>, <sup>3</sup>B  
0.00  
(0.00)

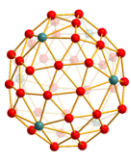

**5b** C<sub>1</sub>, <sup>1</sup>A  
0.05  
(0.05)

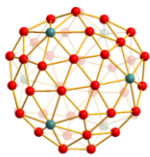

**5c** D<sub>3h</sub>, <sup>3</sup>A<sub>1</sub>  
0.05  
(0.06)

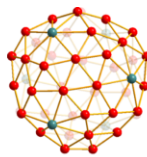

**5d** C<sub>1</sub>, <sup>1</sup>A  
0.07  
(0.09)

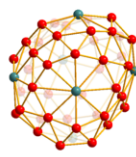

**5e** C<sub>1</sub>, <sup>1</sup>A  
0.18  
(0.16)

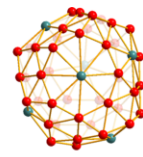

**5f** C<sub>1</sub>, <sup>1</sup>A  
0.59  
(0.46)

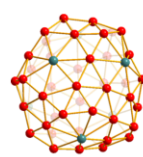

**5g** C<sub>1</sub>, <sup>3</sup>A  
0.59  
(0.58)

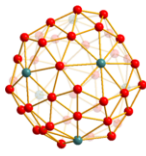

**5h** C<sub>1</sub>, <sup>3</sup>A  
0.66  
(0.64)

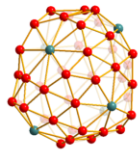

**5i** C<sub>1</sub>, <sup>1</sup>A  
0.69  
(0.60)

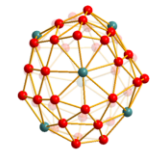

**5j** C<sub>1</sub>, <sup>3</sup>A  
0.72  
(0.59)

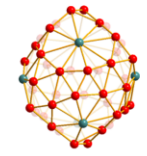

**5k** C<sub>1</sub>, <sup>1</sup>A  
0.90  
(0.84)

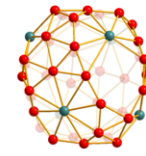

**5l** C<sub>1</sub>, <sup>1</sup>A  
1.03  
(0.92)

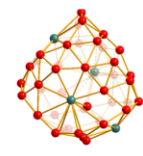

**5m** C<sub>1</sub>, <sup>1</sup>A  
3.30  
(2.25)

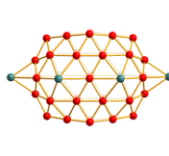

**5n** D<sub>2h</sub>, <sup>1</sup>A<sub>1</sub>  
5.15  
(5.26)

(f) Ni<sub>8</sub>B<sub>56</sub>

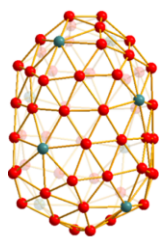

**6a** C<sub>2</sub>, <sup>1</sup>A  
0.00  
(0.00)

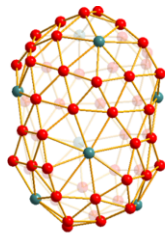

**6b** C<sub>1</sub>, <sup>1</sup>A  
0.29  
(0.20)

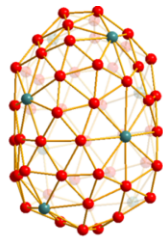

**6c** C<sub>1</sub>, <sup>1</sup>A  
0.33  
(0.29)

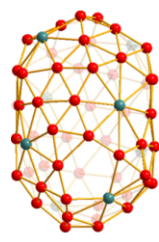

**6d** C<sub>1</sub>, <sup>1</sup>A  
1.12  
(0.92)

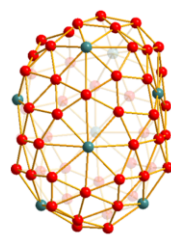

**6e** C<sub>1</sub>, <sup>1</sup>A  
1.17  
(0.84)

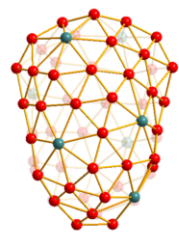

**6f** C<sub>1</sub>, <sup>1</sup>A  
1.25  
(1.10)

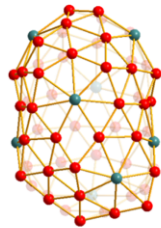

**6g** C<sub>1</sub>, <sup>1</sup>A  
1.33  
(1.20)

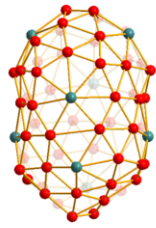

**6h** C<sub>1</sub>, <sup>1</sup>A  
1.63  
(1.47)

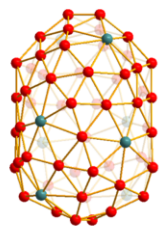

**6i** C<sub>1</sub>, <sup>1</sup>A  
1.64  
(1.36)

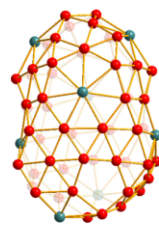

**6j** C<sub>1</sub>, <sup>1</sup>A  
1.72  
(1.62)

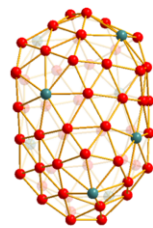

**6k** C<sub>1</sub>, <sup>1</sup>A  
1.80  
(1.64)

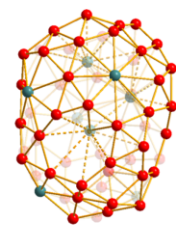

**6l** C<sub>1</sub>, <sup>1</sup>A  
6.64  
(6.48)

**Figure S2.** The optimized structures of  $C_2 Ni_{10}B_{70}$ , and  $C_2 Ni_{12}B_{84}$ .

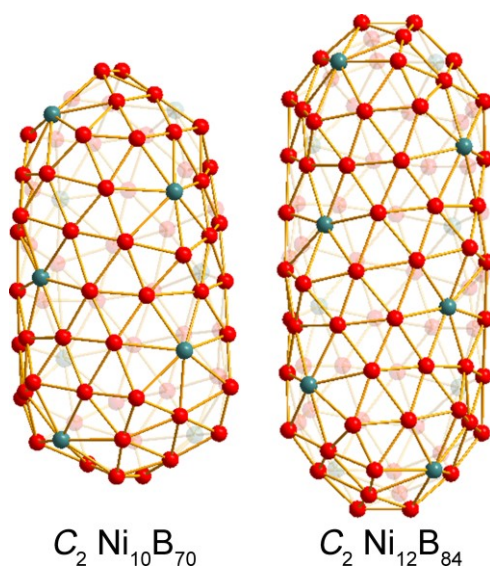



**Figure S3.** BOMD simulations of (a)  $C_2$   $Ni_6 \in B_{39}^-$  (**1**), (b)  $D_{2d}$   $Ni_6 \in B_{40}$  (**2**), (c)  $C_1$   $Ni_6 \in B_{41}^+$  (**3**), (d)  $C_2$   $Ni_6 \in B_{42}^{2+}$  (**4**), (e)  $Ni_6 \in B_{42}$  (**5**), and (f)  $Ni_8 \in B_{56}$  (**6**) at different temperatures with the RMSD and MAXD indicated in Å.

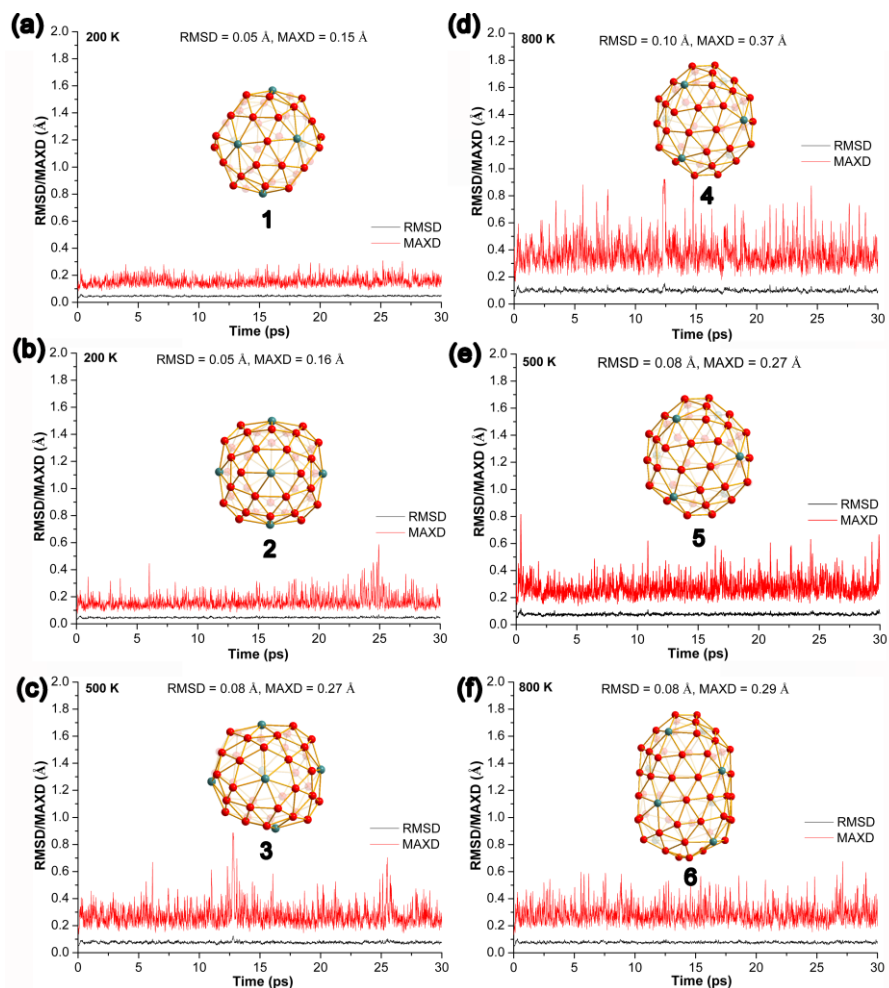

**Figure S4.** The optimized structures of 1D Ni/B binary nanotubes.

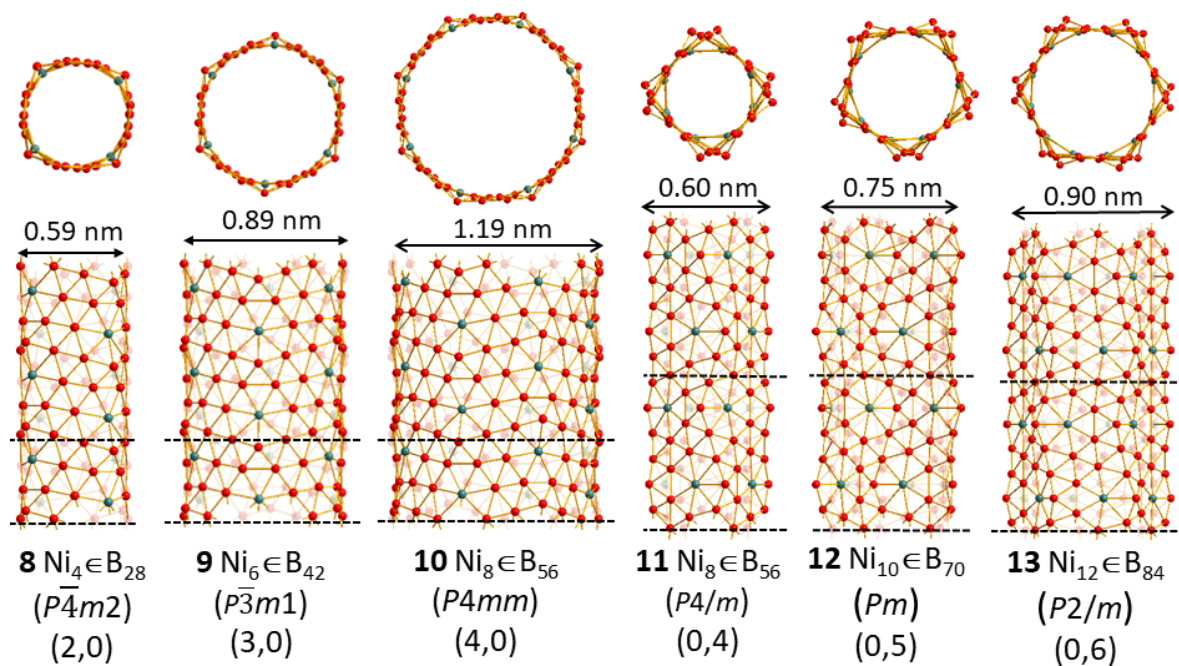

**Figure S5.** Band structure and PDOS of a series of 1D Ni/B binary nanotubes. (a)–(e) corresponds to nanotubes **8–13**.

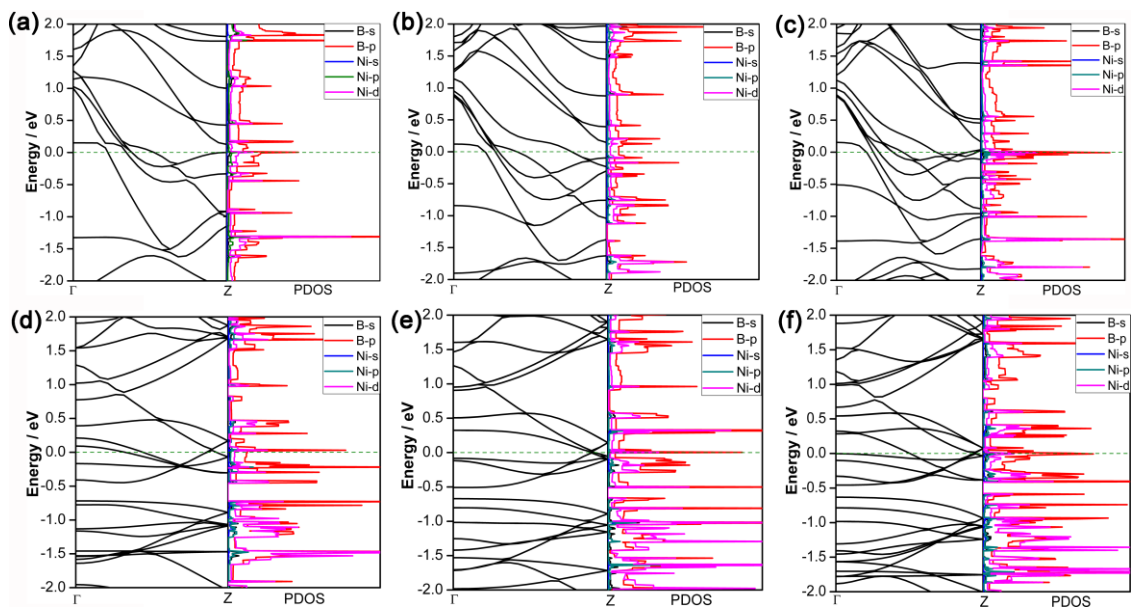

**Table S1.** Optimized cartesian coordinates (x, y, z) of (a)  $C_2$  Ni<sub>6</sub>&B<sub>39</sub><sup>-</sup> (**1**), (b)  $D_{2d}$  Ni<sub>6</sub>&B<sub>40</sub> (**2**), (c)  $C_1$  Ni<sub>6</sub>&B<sub>41</sub><sup>+</sup> (**3**), (d)  $C_2$  Ni<sub>6</sub>&B<sub>42</sub><sup>2+</sup> (**4**), (e) Ni<sub>6</sub>B<sub>42</sub> (**5**), (f) Ni<sub>8</sub>B<sub>56</sub> (**6**), (g)  $C_2$  Ni<sub>10</sub>&B<sub>70</sub> and (f) Ni<sub>12</sub>&B<sub>84</sub> at PBE0/6-311+G(d) level.

(a)  $C_2$  Ni<sub>6</sub>&B<sub>39</sub><sup>-</sup> (**1**)

|    |             |             |             |
|----|-------------|-------------|-------------|
| B  | -1.13770400 | -3.03315600 | -1.37782200 |
| B  | 0.64585900  | 0.46011300  | -3.34239500 |
| B  | 0.46578800  | -2.46223400 | -1.50638900 |
| B  | -0.11132500 | 2.82142100  | 2.11784200  |
| B  | -2.45718600 | 1.45262700  | 1.22642000  |
| B  | -3.30920900 | -0.62315700 | -0.64469300 |
| B  | 1.58916800  | -2.80854300 | 1.37746500  |
| B  | 3.30920900  | 0.62315700  | -0.64469300 |
| B  | 1.75277000  | -2.40981900 | -0.24489700 |
| B  | -1.95737900 | 1.84289500  | -1.75277900 |
| B  | -0.46578800 | 2.46223400  | -1.50638900 |
| B  | 1.91260100  | 2.94068300  | 0.12624200  |
| B  | -1.03992800 | 1.44689400  | 2.30696500  |
| B  | -1.91260100 | -2.94068300 | 0.12624200  |
| B  | -1.58916800 | 2.80854300  | 1.37746500  |
| B  | 1.13770400  | 3.03315600  | -1.37782200 |
| B  | -0.98011900 | -1.81419300 | -2.41118400 |
| B  | -0.64585900 | -0.46011300 | -3.34239500 |
| B  | -0.73680500 | 1.13663800  | -2.65868700 |
| B  | -2.29165900 | -1.84300500 | -1.11682500 |
| B  | -2.75817100 | 0.97065100  | -0.55670400 |
| B  | 2.29165900  | 1.84300500  | -1.11682500 |
| B  | 0.98011900  | 1.81419300  | -2.41118400 |
| B  | -1.75277000 | 2.40981900  | -0.24489700 |
| B  | -3.26816300 | 0.08799700  | 0.77836100  |
| B  | 0.11132500  | -2.82142100 | 2.11784200  |
| B  | 2.75817100  | -0.97065100 | -0.55670400 |
| B  | 0.73680500  | -1.13663800 | -2.65868700 |
| B  | -2.66476100 | -1.54766100 | 0.64827600  |
| B  | 1.95737900  | -1.84289500 | -1.75277900 |
| B  | 0.00000000  | 0.00000000  | 2.94904700  |
| B  | -1.47721200 | -2.33056000 | 1.62301600  |
| B  | -0.55180900 | -1.55711600 | 2.86832400  |
| B  | 2.66476100  | 1.54766100  | 0.64827600  |
| B  | 3.26816300  | -0.08799700 | 0.77836100  |
| B  | 2.45718600  | -1.45262700 | 1.22642000  |
| B  | 1.47721200  | 2.33056000  | 1.62301600  |
| B  | 1.03992800  | -1.44689400 | 2.30696500  |
| B  | 0.55180900  | 1.55711600  | 2.86832400  |
| Ni | 0.00000000  | 3.37478400  | 0.25086000  |
| Ni | 1.89273700  | 0.33879900  | 2.14136900  |
| Ni | -1.89273700 | -0.33879900 | 2.14136900  |
| Ni | -2.24062400 | -0.12742700 | -2.20206100 |
| Ni | 2.24062400  | 0.12742700  | -2.20206100 |
| Ni | 0.00000000  | -3.37478400 | 0.25086000  |

(b)  $D_{2d}$  Ni<sub>6</sub>&B<sub>40</sub> (2)

|    |             |             |             |
|----|-------------|-------------|-------------|
| B  | 2.84397900  | 1.88207700  | 0.40731600  |
| B  | 0.00000000  | 1.81351100  | -2.90783400 |
| B  | 2.42609600  | 1.47623400  | -1.23193800 |
| B  | -2.84397900 | -1.88207700 | 0.40731600  |
| B  | -1.81351100 | 0.00000000  | 2.90783400  |
| B  | 0.00000000  | 2.64116900  | 1.99950400  |
| B  | -0.89993800 | -2.43010900 | -1.68005900 |
| B  | 1.47623400  | -2.42609600 | 1.23193800  |
| B  | 2.84397900  | -1.88207700 | 0.40731600  |
| B  | 0.00000000  | -1.81351100 | -2.90783400 |
| B  | 2.42609600  | -1.47623400 | -1.23193800 |
| B  | -1.88207700 | 2.84397900  | -0.40731600 |
| B  | -2.42609600 | 1.47623400  | -1.23193800 |
| B  | -2.42609600 | -1.47623400 | -1.23193800 |
| B  | -2.43010900 | -0.89993800 | 1.68005900  |
| B  | 2.43010900  | 0.89993800  | 1.68005900  |
| B  | 0.89993800  | -2.43010900 | -1.68005900 |
| B  | -2.43010900 | 0.89993800  | 1.68005900  |
| B  | -2.64116900 | 0.00000000  | -1.99950400 |
| B  | 1.88207700  | 2.84397900  | -0.40731600 |
| B  | 0.89993800  | 2.43010900  | -1.68005900 |
| B  | -0.89993800 | 2.43010900  | -1.68005900 |
| B  | -1.47623400 | -2.42609600 | 1.23193800  |
| B  | 1.47623400  | 2.42609600  | 1.23193800  |
| B  | -1.47623400 | 2.42609600  | 1.23193800  |
| B  | -1.42643600 | -0.93815100 | -2.56370900 |
| B  | -1.42643600 | 0.93815100  | -2.56370900 |
| B  | -2.84397900 | 1.88207700  | 0.40731600  |
| B  | -0.93815100 | 1.42643600  | 2.56370900  |
| B  | 0.00000000  | -2.64116900 | 1.99950400  |
| B  | 2.43010900  | -0.89993800 | 1.68005900  |
| B  | 1.42643600  | -0.93815100 | -2.56370900 |
| B  | 1.42643600  | 0.93815100  | -2.56370900 |
| B  | 0.93815100  | 1.42643600  | 2.56370900  |
| B  | -1.88207700 | -2.84397900 | -0.40731600 |
| B  | 2.64116900  | 0.00000000  | -1.99950400 |
| B  | -0.93815100 | -1.42643600 | 2.56370900  |
| B  | 1.81351100  | 0.00000000  | 2.90783400  |
| B  | 1.88207700  | -2.84397900 | -0.40731600 |
| B  | 0.93815100  | -1.42643600 | 2.56370900  |
| Ni | 0.00000000  | 3.14132000  | 0.03882000  |
| Ni | 0.00000000  | -3.14132000 | 0.03882000  |
| Ni | 3.14132000  | 0.00000000  | -0.03882000 |
| Ni | -3.14132000 | 0.00000000  | -0.03882000 |
| Ni | 0.00000000  | 0.00000000  | 3.61982400  |
| Ni | 0.00000000  | 0.00000000  | -3.61982400 |

(c)  $C_1 Ni_6 \& B_{41}^+$  (3)

|    |             |             |             |
|----|-------------|-------------|-------------|
| B  | 1.27854600  | 3.31275100  | 0.22728000  |
| B  | -1.55186700 | 2.95335700  | -0.27949900 |
| B  | 0.38601300  | 0.83327800  | 2.89734100  |
| B  | -1.80634000 | 2.14449200  | 1.44118600  |
| B  | -1.97739400 | 0.76933400  | -2.25475100 |
| B  | 0.13460400  | -1.24343700 | -2.57210400 |
| B  | 1.19086000  | 2.60957100  | -1.31601100 |
| B  | 1.41564100  | -0.02106200 | -2.58076000 |
| B  | -0.25220900 | -3.48981200 | -0.53242400 |
| B  | -1.17749100 | -2.15592600 | 1.88794900  |
| B  | 1.14559100  | -2.97924500 | 0.24802400  |
| B  | -2.63734900 | -0.79471800 | -1.60272000 |
| B  | -2.63171300 | -1.54024200 | 1.02148200  |
| B  | 1.18982100  | -0.60974500 | 3.16549400  |
| B  | 2.78369600  | 0.82237100  | 1.22963400  |
| B  | 3.02331200  | -0.71919600 | 0.29442600  |
| B  | -0.32418500 | -3.33597400 | 1.05577500  |
| B  | 2.10059900  | 0.60173300  | 2.72116800  |
| B  | -0.42585800 | -0.81156700 | 2.83076500  |
| B  | -1.33674800 | 0.72306100  | 2.45746500  |
| B  | 0.68758400  | -2.64296300 | -1.58943500 |
| B  | 2.35284300  | -0.85083600 | 1.91151800  |
| B  | 2.20354100  | -2.01566400 | -0.76883900 |
| B  | -0.25112000 | 3.01832500  | 1.00794500  |
| B  | -1.67345400 | -2.87684000 | 0.22260000  |
| B  | -1.44859500 | -0.66874900 | -2.77785000 |
| B  | -2.52893100 | 2.07912700  | -1.37826200 |
| B  | -3.60983600 | -0.76568300 | -0.21801000 |
| B  | 2.38115900  | 2.11120000  | 0.04512100  |
| B  | -0.25808000 | 0.49146700  | -2.75873800 |
| B  | 2.30353500  | 1.30364900  | -1.59435100 |
| B  | -0.05786300 | 3.56639200  | -0.56542900 |
| B  | 3.34242900  | 0.83751800  | -0.32018400 |
| B  | -0.53150400 | 2.16734800  | 2.43443100  |
| B  | 1.73123600  | -1.68434700 | -2.36998400 |
| B  | -2.93438800 | -2.14733200 | -0.52317700 |
| B  | -2.88808200 | 2.10218500  | 0.18605900  |
| B  | 1.04269900  | 1.56811200  | -2.60160800 |
| B  | -2.00161200 | -0.84604400 | 2.40586600  |
| B  | 2.45107100  | -2.13977800 | 0.84557500  |
| B  | -3.21868600 | 0.71752000  | -0.76098900 |
| Ni | 3.14824400  | -0.51609600 | -1.70426800 |
| Ni | 0.87796300  | -2.24295200 | 2.13136400  |
| Ni | -2.97393700 | 0.45859400  | 1.27437000  |
| Ni | 1.41360800  | 2.23636300  | 1.87181000  |
| Ni | -0.69552100 | 2.34922700  | -2.04454500 |
| Ni | -1.34562000 | -2.35542700 | -1.73801300 |

(d) C<sub>2</sub> Ni<sub>6</sub>&B<sub>42</sub><sup>2+</sup> (4)

|    |             |             |             |
|----|-------------|-------------|-------------|
| B  | 1.27352100  | 0.61873300  | -3.10908100 |
| B  | -1.27352100 | -0.61873300 | -3.10908100 |
| B  | -1.39095200 | 2.30724600  | -1.11555600 |
| B  | -2.61322100 | -0.21449100 | -1.91927200 |
| B  | -0.01615200 | -3.13463800 | -0.64433900 |
| B  | 2.04396300  | -2.29674800 | 1.72628400  |
| B  | 1.59645700  | -1.19223300 | -2.52055300 |
| B  | 2.52933200  | -1.86673700 | 0.19005300  |
| B  | 0.46542500  | -0.63232300 | 3.62586900  |
| B  | -2.04396300 | 2.29674800  | 1.72628400  |
| B  | 1.14450300  | 0.75929100  | 2.97315000  |
| B  | -0.84284900 | -2.67569400 | 0.71058700  |
| B  | -2.53944800 | -0.55549200 | 1.83541500  |
| B  | -0.95534100 | 2.81455700  | 0.60140100  |
| B  | 1.54066100  | 2.51627500  | -0.91386900 |
| B  | 2.44622500  | 1.79135900  | 0.53151600  |
| B  | -1.79363300 | 0.93902400  | 2.73142100  |
| B  | 0.01615200  | 3.13463800  | -0.64433900 |
| B  | -2.52933200 | 1.86673700  | 0.19005300  |
| B  | -2.73457200 | 1.38340300  | -1.39698400 |
| B  | 1.79363300  | -0.93902400 | 2.73142100  |
| B  | 0.84284900  | 2.67569400  | 0.71058700  |
| B  | 2.53944800  | 0.55549200  | 1.83541500  |
| B  | -0.37889800 | 0.70685900  | -3.53531800 |
| B  | -1.14450300 | -0.75929100 | 2.97315000  |
| B  | 0.95534100  | -2.81455700 | 0.60140100  |
| B  | -1.54066100 | -2.51627500 | -0.91386900 |
| B  | -2.44622500 | -1.79135900 | 0.53151600  |
| B  | 2.16197900  | 1.76938100  | -2.35889500 |
| B  | 1.39095200  | -2.30724600 | -1.11555600 |
| B  | 2.61322100  | 0.21449100  | -1.91927200 |
| B  | 0.37889800  | -0.70685900 | -3.53531800 |
| B  | 2.97714300  | 1.65085400  | -1.02119100 |
| B  | -1.59645700 | 1.19223300  | -2.52055300 |
| B  | 3.00758100  | -1.03559000 | 1.62106100  |
| B  | -1.73683200 | -1.97277400 | 1.98558400  |
| B  | -2.16197900 | -1.76938100 | -2.35889500 |
| B  | 2.73457200  | -1.38340300 | -1.39698400 |
| B  | -3.00758100 | 1.03559000  | 1.62106100  |
| B  | 1.73683200  | 1.97277400  | 1.98558400  |
| B  | -2.97714300 | -1.65085400 | -1.02119100 |
| B  | -0.46542500 | 0.63232300  | 3.62586900  |
| Ni | 0.18512600  | -2.22361400 | 2.41092900  |
| Ni | -0.18512600 | 2.22361400  | 2.41092900  |
| Ni | -0.18512600 | -2.22005300 | -2.39934400 |
| Ni | 0.18512600  | 2.22005300  | -2.39934400 |
| Ni | -3.31443100 | 0.00273700  | -0.01110000 |
| Ni | 3.31443100  | -0.00273700 | -0.01110000 |

(e)  $C_2 Ni_6 B_{42}$  (5)

|    |             |             |             |
|----|-------------|-------------|-------------|
| B  | 1.30601000  | 0.58075300  | -3.11357400 |
| B  | -1.30601000 | -0.58075300 | -3.11357400 |
| B  | -1.36422300 | 2.29241500  | -1.12200200 |
| B  | -2.60620900 | -0.19843400 | -1.90754700 |
| B  | -0.03644300 | -3.12983800 | -0.64057700 |
| B  | 2.02871400  | -2.33537500 | 1.71913500  |
| B  | 1.56460800  | -1.15567700 | -2.51109800 |
| B  | 2.50589200  | -1.86785700 | 0.18454600  |
| B  | 0.47233400  | -0.62519700 | 3.67957200  |
| B  | -2.02871400 | 2.33537500  | 1.71913500  |
| B  | 1.14941000  | 0.74078500  | 2.94318800  |
| B  | -0.87133300 | -2.63359800 | 0.70915400  |
| B  | -2.53412900 | -0.52353400 | 1.83421900  |
| B  | -0.94379700 | 2.85513700  | 0.60749600  |
| B  | 1.56460800  | 2.47340300  | -0.90371500 |
| B  | 2.44308300  | 1.76913200  | 0.50630000  |
| B  | -1.76686800 | 0.94760100  | 2.72912300  |
| B  | 0.03644300  | 3.12983800  | -0.64057700 |
| B  | -2.50589200 | 1.86785700  | 0.18454600  |
| B  | -2.73073000 | 1.40951900  | -1.39848200 |
| B  | 1.76686800  | -0.94760100 | 2.72912300  |
| B  | 0.87133300  | 2.63359800  | 0.70915400  |
| B  | 2.53412900  | 0.52353400  | 1.83421900  |
| B  | -0.38526700 | 0.70457700  | -3.58474800 |
| B  | -1.14941000 | -0.74078500 | 2.94318800  |
| B  | 0.94379700  | -2.85513700 | 0.60749600  |
| B  | -1.56460800 | -2.47340300 | -0.90371500 |
| B  | -2.44308300 | -1.76913200 | 0.50630000  |
| B  | 2.19668000  | 1.74523300  | -2.38679300 |
| B  | 1.36422300  | -2.29241500 | -1.12200200 |
| B  | 2.60620900  | 0.19843400  | -1.90754700 |
| B  | 0.38526700  | -0.70457700 | -3.58474800 |
| B  | 3.02273900  | 1.64376300  | -1.03176700 |
| B  | -1.56460800 | 1.15567700  | -2.51109800 |
| B  | 2.99724700  | -1.07037000 | 1.62391800  |
| B  | -1.77144300 | -1.96050800 | 1.99305100  |
| B  | -2.19668000 | -1.74523300 | -2.38679300 |
| B  | 2.73073000  | -1.40951900 | -1.39848200 |
| B  | -2.99724700 | 1.07037000  | 1.62391800  |
| B  | 1.77144300  | 1.96050800  | 1.99305100  |
| B  | -3.02273900 | -1.64376300 | -1.03176700 |
| B  | -0.47233400 | 0.62519700  | 3.67957200  |
| Ni | 0.16206400  | -2.18030600 | 2.39374100  |
| Ni | -0.16206400 | 2.18030600  | 2.39374100  |
| Ni | -0.21203100 | -2.17571700 | -2.37353300 |
| Ni | 0.21203100  | 2.17571700  | -2.37353300 |
| Ni | -3.29191200 | 0.02819700  | -0.00760100 |
| Ni | 3.29191200  | -0.02819700 | -0.00760100 |



(f) of  $C_2 Ni_8 B_{56}$  (6)

|   |             |             |             |
|---|-------------|-------------|-------------|
| B | 0.79403200  | -1.17324000 | -4.29637200 |
| B | -0.79403200 | 1.17324000  | -4.29637200 |
| B | 2.11521600  | 1.60948900  | -2.29015700 |
| B | -0.53256900 | 2.50689500  | -3.06890700 |
| B | -3.17116300 | -0.36264600 | -1.92273700 |
| B | -0.99136800 | -1.73149900 | -3.68117300 |
| B | -1.57716600 | -2.63868000 | -0.84185200 |
| B | -1.21996800 | 2.53606100  | 0.64105200  |
| B | 2.69215700  | -1.22449100 | -2.13124500 |
| B | 2.32785700  | -2.25069300 | -0.67312800 |
| B | 3.17116300  | 0.36264600  | -1.92273700 |
| B | 1.57716600  | 2.63868000  | -0.84185200 |
| B | 0.99635800  | 2.82666600  | -2.48784300 |
| B | 1.21996800  | -2.53606100 | 0.64105200  |
| B | 0.64791400  | 0.46636500  | -4.72970700 |
| B | -2.69215700 | 1.22449100  | -2.13124500 |
| B | -2.32785700 | 2.25069300  | -0.67312800 |
| B | 2.03166600  | -1.94627000 | -3.57772400 |
| B | -2.11521600 | -1.60948900 | -2.29015700 |
| B | 0.53256900  | -2.50689500 | -3.06890700 |
| B | -0.64791400 | -0.46636500 | -4.72970700 |
| B | 2.07119000  | -2.78853800 | -2.23479500 |
| B | 0.99136800  | 1.73149900  | -3.68117300 |
| B | -0.55477700 | -2.80924900 | 0.58205100  |
| B | -2.03166600 | 1.94627000  | -3.57772400 |
| B | -0.99635800 | -2.82666600 | -2.48784300 |
| B | 0.55477700  | 2.80924900  | 0.58205100  |
| B | -2.07119000 | 2.78853800  | -2.23479500 |
| B | -1.21996800 | -2.75141200 | 2.17434200  |
| B | -2.52083600 | -0.54064500 | 3.07994400  |
| B | -0.36412800 | 3.12520400  | 1.90274200  |
| B | 2.26148100  | 2.32615300  | 0.63072600  |
| B | -2.89650500 | 0.55534000  | -0.58032900 |
| B | 1.63436400  | -2.07058400 | 2.25634300  |
| B | 2.65881000  | -1.54701400 | 0.87409200  |
| B | 0.36412800  | -3.12520400 | 1.90274200  |
| B | -2.26148100 | -2.32615300 | 0.63072600  |
| B | -2.74905400 | -2.03826700 | 2.22776100  |
| B | 2.89650500  | -0.55534000 | -0.58032900 |
| B | -1.63436400 | 2.07058400  | 2.25634300  |
| B | -2.65881000 | 1.54701400  | 0.87409200  |
| B | 1.21996800  | 2.75141200  | 2.17434200  |
| B | 2.52083600  | 0.54064500  | 3.07994400  |
| B | 2.87074300  | -1.00533600 | 2.50065300  |
| B | 2.57875800  | 1.22133900  | -0.65752000 |
| B | 2.74905400  | 2.03826700  | 2.22776100  |
| B | -2.57875800 | -1.22133900 | -0.65752000 |
| B | -2.87074300 | 1.00533600  | 2.50065300  |
| B | 0.47787400  | -0.65302700 | 4.76504300  |
| B | 1.18116400  | 0.74685900  | 4.27938200  |
| B | -1.70628400 | 0.93025700  | 3.66415700  |

|    |             |             |             |
|----|-------------|-------------|-------------|
| B  | 1.70628400  | -0.93025700 | 3.66415700  |
| B  | -1.18116400 | -0.74685900 | 4.27938200  |
| B  | -1.93029300 | -2.03979500 | 3.57322200  |
| B  | 1.93029300  | 2.03979500  | 3.57322200  |
| B  | -0.47787400 | 0.65302700  | 4.76504300  |
| Ni | -2.22294600 | -0.08237200 | -3.61908600 |
| Ni | 2.22294600  | 0.08237200  | -3.61908600 |
| Ni | 0.09790300  | -2.20191800 | 3.62282300  |
| Ni | -0.09790300 | 2.20191800  | 3.62282300  |
| Ni | 3.01907400  | 0.43615300  | 1.10691000  |
| Ni | -3.01907400 | -0.43615300 | 1.10691000  |
| Ni | -0.42702800 | 3.00023400  | -1.10672400 |
| Ni | 0.42702800  | -3.00023400 | -1.10672400 |

(g) C<sub>2</sub> Ni<sub>10</sub>&B<sub>70</sub>

|   |             |             |             |
|---|-------------|-------------|-------------|
| B | -1.82737700 | 2.33099300  | -0.45728300 |
| B | -1.00474500 | -2.75189600 | -1.72957200 |
| B | 1.00474500  | 2.75189600  | -1.72957200 |
| B | 1.82737700  | -2.33099300 | -0.45728300 |
| B | -2.83304000 | 0.99804200  | -0.66556400 |
| B | 2.57219400  | 1.97205500  | -1.88326700 |
| B | -2.57219400 | -1.97205500 | -1.88326700 |
| B | 2.83304000  | -0.99804200 | -0.66556400 |
| B | -2.87031800 | -0.89122300 | -0.60053600 |
| B | 2.27983200  | -1.84963300 | -2.01350800 |
| B | -2.27983200 | 1.84963300  | -2.01350800 |
| B | 2.87031800  | 0.89122300  | -0.60053600 |
| B | 0.78421700  | -2.64749800 | -1.77544000 |
| B | 2.00332400  | 2.34347800  | -0.31318000 |
| B | -0.78421700 | 2.64749800  | -1.77544000 |
| B | -2.00332400 | -2.34347800 | -0.31318000 |
| B | -3.51384600 | 0.09292000  | 0.47602400  |
| B | 3.51384600  | -0.09292000 | 0.47602400  |
| B | 0.05224600  | 3.40506800  | 1.85390500  |
| B | -0.05224600 | -3.40506800 | 1.85390500  |
| B | -2.73403700 | 1.60327000  | 0.94028700  |
| B | 2.73403700  | -1.60327000 | 0.94028700  |
| B | 1.50251400  | 2.55751900  | 1.40588500  |
| B | -1.50251400 | -2.55751900 | 1.40588500  |
| B | 1.45092700  | -2.66200700 | 1.33219900  |
| B | -1.45092700 | 2.66200700  | 1.33219900  |
| B | 2.71461400  | 1.38725200  | 1.02889400  |
| B | -2.71461400 | -1.38725200 | 1.02889400  |
| B | 1.27940600  | 0.61287100  | -5.48049300 |
| B | -1.27940600 | -0.61287100 | -5.48049300 |
| B | -1.25755700 | 2.28481800  | -3.41509900 |
| B | -2.55513000 | -0.16632200 | -4.23546300 |
| B | -0.12367500 | -3.17906500 | -3.05501900 |
| B | 1.96793700  | -2.40906400 | 4.13150800  |
| B | 1.55769100  | -1.23034100 | -4.84731400 |
| B | 2.46572000  | -2.02322300 | 2.53689400  |
| B | 0.44383600  | -0.64752100 | 6.01256200  |
| B | -1.96793700 | 2.40906400  | 4.13150800  |
| B | 1.13568400  | 0.71101400  | 5.26011300  |
| B | -0.89422500 | -2.70383600 | 3.06382300  |
| B | -2.46572000 | -0.45462200 | 4.10858100  |
| B | -0.91816900 | 3.05060000  | 3.04864700  |
| B | 1.61521700  | 2.48625600  | -3.29989700 |
| B | 2.15913600  | 1.55378800  | 2.64927400  |
| B | -1.73950900 | 1.03112500  | 5.08548500  |
| B | 0.12367500  | 3.17906500  | -3.05501900 |
| B | -2.46572000 | 2.02322300  | 2.53689400  |
| B | -2.64051800 | 1.38924200  | -3.66318200 |
| B | 1.73950900  | -1.03112500 | 5.08548500  |
| B | 0.89422500  | 2.70383600  | 3.06382300  |
| B | 2.46572000  | 0.45462200  | 4.10858100  |

|    |             |             |             |
|----|-------------|-------------|-------------|
| B  | -0.36971200 | 0.71146900  | -5.90354100 |
| B  | -1.13568400 | -0.71101400 | 5.26011300  |
| B  | 0.91816900  | -3.05060000 | 3.04864700  |
| B  | -1.61521700 | -2.48625600 | -3.29989700 |
| B  | -2.15913600 | -1.55378800 | 2.64927400  |
| B  | 2.23631600  | 1.72922800  | -4.77734900 |
| B  | 1.25755700  | -2.28481800 | -3.41509900 |
| B  | 2.55513000  | 0.16632200  | -4.23546300 |
| B  | 0.36971200  | -0.71146900 | -5.90354100 |
| B  | 3.07627600  | 1.64562800  | -3.44658100 |
| B  | -1.55769100 | 1.23034100  | -4.84731400 |
| B  | 2.92238100  | -1.15515500 | 3.95371400  |
| B  | -1.74510200 | -1.88468300 | 4.25107300  |
| B  | -2.23631600 | -1.72922800 | -4.77734900 |
| B  | 2.64051800  | -1.38924200 | -3.66318200 |
| B  | -2.92238100 | 1.15515500  | 3.95371400  |
| B  | 1.74510200  | 1.88468300  | 4.25107300  |
| B  | -3.07627600 | -1.64562800 | -3.44658100 |
| B  | -0.44383600 | 0.64752100  | 6.01256200  |
| Ni | 0.11814300  | -2.25243500 | 4.79622400  |
| Ni | -0.11814300 | 2.25243500  | 4.79622400  |
| Ni | -3.22174100 | 0.11595500  | 2.35364400  |
| Ni | 3.22174100  | -0.11595500 | 2.35364400  |
| Ni | 0.06322600  | 2.78692100  | 0.01577400  |
| Ni | -0.06322600 | -2.78692100 | 0.01577400  |
| Ni | -3.22554100 | 0.01212200  | -2.32696800 |
| Ni | 3.22554100  | -0.01212200 | -2.32696800 |
| Ni | 0.24683400  | 2.19696000  | -4.76306300 |
| Ni | -0.24683400 | -2.19696000 | -4.76306300 |

(f) C<sub>2</sub> Ni<sub>12</sub>&B<sub>84</sub>

|   |             |             |             |
|---|-------------|-------------|-------------|
| B | -2.91111200 | 1.52676800  | 0.26140900  |
| B | 1.23275200  | 2.91194100  | -2.60711800 |
| B | -1.17925500 | 2.91467300  | 2.56175900  |
| B | 2.76390200  | 1.58112800  | -0.23838900 |
| B | -2.60122400 | 1.80149500  | -1.43367200 |
| B | 0.40270400  | 3.06800800  | 3.34150600  |
| B | -0.37684000 | 3.07712200  | -3.26815000 |
| B | 2.65002700  | 1.77257400  | 1.42111600  |
| B | -1.39168700 | 1.77080400  | -2.78830300 |
| B | 2.85932100  | 3.14469900  | 0.43610900  |
| B | -2.86539800 | 3.18835700  | -0.43467400 |
| B | 1.40833100  | 1.74599600  | 2.79777700  |
| B | 2.37553500  | 2.92385600  | -1.20045500 |
| B | -0.25835800 | 1.53759900  | 3.15379900  |
| B | -2.33886500 | 2.92415500  | 1.19189700  |
| B | 0.29413800  | 1.52165700  | -3.15851400 |
| B | -2.44649800 | 0.60714200  | -2.49860100 |
| B | 2.42481800  | 0.54919600  | 2.45634600  |
| B | -2.42481800 | -0.54919600 | 2.45634600  |
| B | 2.44649800  | -0.60714200 | -2.49860100 |
| B | -2.80779400 | 0.21102700  | -0.84113700 |
| B | 2.93410300  | 0.13867200  | 0.84866300  |
| B | -0.88215300 | -0.16439800 | 3.05337100  |
| B | 0.85208700  | -0.15686100 | -3.04429200 |
| B | 2.80779400  | -0.21102700 | -0.84113700 |
| B | -2.93410300 | -0.13867200 | 0.84866300  |
| B | 0.88215300  | 0.16439800  | 3.05337100  |
| B | -0.85208700 | 0.15686100  | -3.04429200 |
| B | 0.44900200  | 6.68281100  | 1.36585900  |
| B | -0.46367500 | 6.62602300  | -1.31447100 |
| B | -2.47123200 | 4.54024100  | 0.62671600  |
| B | -1.65106200 | 5.45184500  | -1.97099500 |
| B | 2.16071600  | 4.20701600  | -2.22362700 |
| B | 1.92646500  | 5.99645700  | 0.30334200  |
| B | 2.91111200  | -1.52676800 | 0.26140900  |
| B | -1.23275200 | -2.91194100 | -2.60711800 |
| B | -0.67790600 | 4.50118000  | 2.91417500  |
| B | 0.25835800  | -1.53759900 | 3.15379900  |
| B | -2.15279900 | 4.19203600  | 2.24439100  |
| B | -2.76390200 | -1.58112800 | -0.23838900 |
| B | -2.84506300 | 4.84240400  | -0.96910400 |
| B | 1.17925500  | -2.91467300 | 2.56175900  |
| B | -0.77386900 | 7.08552700  | 0.24891000  |
| B | 0.66666000  | 4.49713400  | -2.89753900 |
| B | -0.29413800 | -1.52165700 | -3.15851400 |
| B | 0.29205200  | 5.96812300  | 2.82331400  |
| B | 2.51283200  | 4.57382600  | -0.62971200 |
| B | 1.64560300  | 5.41338300  | 1.99014700  |
| B | 0.77133300  | 7.09569800  | -0.19216100 |
| B | 0.93986800  | 4.65389900  | 3.39348000  |
| B | -1.95286200 | 6.03355100  | -0.30202600 |

|    |             |             |             |
|----|-------------|-------------|-------------|
| B  | 2.33886500  | -2.92415500 | 1.19189700  |
| B  | -0.29205200 | 5.98161300  | -2.81221800 |
| B  | 2.81059100  | 4.81541400  | 0.97847800  |
| B  | -2.37553500 | -2.92385600 | -1.20045500 |
| B  | -0.94960100 | 4.66461600  | -3.37190500 |
| Ni | -1.93822200 | -1.18552500 | -2.00392800 |
| Ni | 1.80795200  | -1.18660900 | 1.90304100  |
| Ni | -1.80795200 | 1.18660900  | 1.90304100  |
| Ni | 1.93822200  | 1.18552500  | -2.00392800 |
| Ni | -2.17912900 | 3.51566300  | -2.31763800 |
| Ni | 2.23350600  | 3.49340500  | 2.36277000  |
| Ni | -1.43709200 | 5.94311600  | 1.69244600  |
| Ni | 1.41048800  | 5.94614400  | -1.67517200 |
| B  | 0.46367500  | -6.62602300 | -1.31447100 |
| B  | -0.44900200 | -6.68281100 | 1.36585900  |
| B  | -2.51283200 | -4.57382600 | -0.62971200 |
| B  | -1.64560300 | -5.41338300 | 1.99014700  |
| B  | 2.15279900  | -4.19203600 | 2.24439100  |
| B  | 1.95286200  | -6.03355100 | -0.30202600 |
| B  | 2.86539800  | -3.18835700 | -0.43467400 |
| B  | -1.40833100 | -1.74599600 | 2.79777700  |
| B  | -0.66666000 | -4.49713400 | -2.89753900 |
| B  | 0.37684000  | -3.07712200 | -3.26815000 |
| B  | -2.16071600 | -4.20701600 | -2.22362700 |
| B  | -2.85932100 | -3.14469900 | 0.43610900  |
| B  | -2.81059100 | -4.81541400 | 0.97847800  |
| B  | 1.39168700  | -1.77080400 | -2.78830300 |
| B  | -0.77133300 | -7.09569800 | -0.19216100 |
| B  | 0.67790600  | -4.50118000 | 2.91417500  |
| B  | -0.40270400 | -3.06800800 | 3.34150600  |
| B  | 0.29205200  | -5.98161300 | -2.81221800 |
| B  | 2.47123200  | -4.54024100 | 0.62671600  |
| B  | 1.65106200  | -5.45184500 | -1.97099500 |
| B  | 0.77386900  | -7.08552700 | 0.24891000  |
| B  | 0.94960100  | -4.66461600 | -3.37190500 |
| B  | -1.92646500 | -5.99645700 | 0.30334200  |
| B  | 2.60122400  | -1.80149500 | -1.43367200 |
| B  | -0.29205200 | -5.96812300 | 2.82331400  |
| B  | 2.84506300  | -4.84240400 | -0.96910400 |
| B  | -2.65002700 | -1.77257400 | 1.42111600  |
| B  | -0.93986800 | -4.65389900 | 3.39348000  |
| Ni | 1.43709200  | -5.94311600 | 1.69244600  |
| Ni | -1.41048800 | -5.94614400 | -1.67517200 |
| Ni | -2.23350600 | -3.49340500 | 2.36277000  |
| Ni | 2.17912900  | -3.51566300 | -2.31763800 |
